# Supplementary material for: Comparison and Harmonization of Different Semi-Automated and Automated qRT-PCR Assays in the Assessment of SARS-CoV-2
Source: MDPI journal article supplement (doi:10.3390/v14102239), 2022-10-12
Supplement: s1 [file s1]

## Suppl. Material

Supplementary Table S1: Based on the results from our reference method on the Alinity m, sensitivity, positive predictive value (PPV), specificity and negative predictive value (NPV) were calculated for cobas® 6800, GeneXpert, genesig® and RIDA®GENE.

| Assay              | n         | Overall<br>Positives | Correct<br>Positives | Sensitivity / PPV<br>(%) | Overall<br>Negatives | Correct<br>Negatives | Specificity / NPV<br>(%) |
|--------------------|-----------|----------------------|----------------------|--------------------------|----------------------|----------------------|--------------------------|
| <b>cobas® 6800</b> | <b>85</b> | 50                   | 50                   | 98.04% / 100.0%          | 35                   | 34                   | 100.0% / 97.14%          |
| <b>GeneXpert</b>   | <b>85</b> | 51                   | 51                   | 100.0% / 100.0%          | 34                   | 34                   | 100.0% / 100.0%          |
| <b>genesig®</b>    | <b>85</b> | 36                   | 36                   | 70.59% / 100.0%          | 49                   | 34                   | 100.0% / 69.39%          |
| <b>RIDA®GENE</b>   | <b>85</b> | 46                   | 46                   | 90.20% / 100.0%          | 39                   | 34                   | 100.0% / 87.18%          |

Supplementary Table S2: Results of measurements on Alinity m, cobas® 6800, GeneXpert, genesig® and RIDA®GENE. Ct values and corresponding viral loads as calculated by standard curves are displayed. n=85. neg=negative.

|            | Alinity m         |                    |                        |                      | cobas® 6800 |                    |           |                        |                      |
|------------|-------------------|--------------------|------------------------|----------------------|-------------|--------------------|-----------|------------------------|----------------------|
| Sample No. | Ct RdRp- & N-Gene | Isolation Ct-value | Viral Load [copies/ml] | Isolation Viral Load | Ct ORF1a/b  | Isolation Ct-value | Ct E-Gene | Viral Load [copies/ml] | Isolation Viral Load |
| 1          | 33.38             | no                 | 6.20E+02               | no                   | 32.84       | no                 | 34.46     | 3.43E+03               | no                   |
| 2          | 20.36             | yes                | 2.32E+06               | yes                  | 24.81       | yes                | 25.44     | 3.83E+06               | yes                  |
| 3          | 32.04             | no                 | 1.45E+03               | no                   | 33.4        | no                 | 34.36     | 2.10E+03               | no                   |
| 4          | 29.34             | yes                | 7.96E+03               | no                   | 31.6        | no                 | 32.88     | 1.01E+04               | no                   |
| 5          | 35.01             | no                 | 2.21E+02               | no                   | 34.61       | no                 | 36.45     | 7.29E+02               | no                   |
| 6          | 16.31             | yes                | 3.00E+07               | yes                  | 19.94       | yes                | 20.71     | 2.70E+08               | yes                  |
| 7          | 19.83             | yes                | 3.25E+06               | yes                  | 23.63       | yes                | 24.06     | 1.07E+07               | yes                  |
| 8          | 19.97             | yes                | 2.97E+06               | yes                  | 23.23       | yes                | 23.66     | 1.52E+07               | yes                  |
| 9          | 19.83             | yes                | 3.25E+06               | yes                  | 23.68       | yes                | 24.37     | 1.03E+07               | yes                  |
| 10         | 23.7              | yes                | 2.81E+05               | no                   | 27.59       | yes                | 28.2      | 3.37E+05               | no                   |
| 11         | 20.76             | yes                | 1.80E+06               | yes                  | 24.07       | yes                | 24.72     | 7.31E+06               | yes                  |
| 12         | 22.3              | yes                | 6.82E+05               | no                   | 25.04       | yes                | 25.71     | 3.13E+06               | yes                  |
| 13         | 27.98             | yes                | 1.88E+04               | no                   | 30.75       | no                 | 31.64     | 2.13E+04               | no                   |
| 14         | 14.93             | yes                | 7.18E+07               | yes                  | 18.77       | yes                | 19.34     | 7.51E+08               | yes                  |
| 15         | 25.4              | yes                | 9.61E+04               | no                   | 28.27       | yes                | 28.7      | 1.86E+05               | no                   |
| 16         | 17.68             | yes                | 1.26E+07               | yes                  | 21.04       | yes                | 21.81     | 1.03E+08               | yes                  |
| 17         | 17.09             | yes                | 1.83E+07               | yes                  | 21.04       | yes                | 21.6      | 1.03E+08               | yes                  |
| 18         | 17.03             | yes                | 1.91E+07               | yes                  | 20.39       | yes                | 20.95     | 1.82E+08               | yes                  |
| 19         | 25.94             | yes                | 6.83E+04               | no                   | 29.47       | yes                | 30.32     | 6.52E+04               | no                   |

|    |       |     |          |     |       |     |       |          |     |
|----|-------|-----|----------|-----|-------|-----|-------|----------|-----|
| 20 | 13.04 | yes | 2.37E+08 | yes | 16.34 | yes | 17.12 | 6.28E+09 | yes |
| 21 | 24.59 | yes | 1.60E+05 | no  | 28.24 | yes | 29.01 | 1.91E+05 | no  |
| 22 | 33.56 | no  | 5.53E+02 | no  | 32.42 | no  | 34.64 | 4.95E+03 | no  |
| 23 | 19.86 | yes | 3.19E+06 | yes | 23.98 | yes | 24.88 | 7.90E+06 | yes |
| 24 | 29.73 | yes | 6.22E+03 | no  | 31.88 | no  | 32.84 | 7.93E+03 | no  |
| 25 | 22.62 | yes | 5.57E+05 | no  | 26.2  | yes | 26.88 | 1.14E+06 | yes |
| 26 | neg   | no  |          | no  | neg   | no  | neg   |          | no  |
| 27 | 30.22 | no  | 4.57E+03 | no  | 31.66 | no  | 33.22 | 9.61E+03 | no  |
| 28 | 25.64 | yes | 8.26E+04 | no  | 29.14 | yes | 29.7  | 8.69E+04 | no  |
| 29 | 16.95 | yes | 2.00E+07 | yes | 21.94 | yes | 22.35 | 4.70E+07 | yes |
| 30 | 13.27 | yes | 2.05E+08 | yes | 19.39 | yes | 19.33 | 4.37E+08 | yes |
| 31 | 25.42 | yes | 9.49E+04 | no  | 28.83 | yes | 29.73 | 1.14E+05 | no  |
| 32 | 19.52 | yes | 3.95E+06 | yes | 24.58 | yes | 25.53 | 4.68E+06 | yes |
| 33 | 26.36 | yes | 5.24E+04 | no  | 29.99 | yes | 31.02 | 4.14E+04 | no  |
| 34 | 22.76 | yes | 5.10E+05 | no  | 26.29 | yes | 27.21 | 1.05E+06 | yes |
| 35 | 20.21 | yes | 2.55E+06 | yes | 23.6  | yes | 23.92 | 1.10E+07 | yes |
| 36 | 31.74 | no  | 1.75E+03 | no  | 32.44 | no  | 33.62 | 4.86E+03 | no  |
| 37 | 35.05 | no  | 2.16E+02 | no  | neg   | no  | 35.39 |          | no  |
| 38 | neg   | no  |          | no  | neg   | no  | neg   |          | no  |
| 39 | 30.64 | no  | 3.50E+03 | no  | 31.56 | no  | 33    | 1.05E+04 | no  |
| 40 | neg   | no  |          | no  | neg   | no  | neg   |          | no  |
| 41 | 17.48 | yes | 1.43E+07 | yes | 21.21 | yes | 21.63 | 8.90E+07 | yes |
| 42 | 22.12 | yes | 7.64E+05 | no  | 25.42 | yes | 26.12 | 2.25E+06 | yes |
| 43 | 22.05 | yes | 7.98E+05 | no  | 24.83 | yes | 25.45 | 3.76E+06 | yes |
| 44 | neg   | no  |          | no  | neg   | no  | neg   |          | no  |
| 45 | 17.72 | yes | 1.23E+07 | yes | 21.42 | yes | 22.08 | 7.41E+07 | yes |

|    |       |     |          |     |       |     |       |          |     |
|----|-------|-----|----------|-----|-------|-----|-------|----------|-----|
| 46 | 30.77 | no  | 3.23E+03 | no  | 31.13 | no  | 32.65 | 1.53E+04 | no  |
| 47 | 35.43 | no  | 1.70E+02 | no  | 34.62 | no  | 36.5  | 7.23E+02 | no  |
| 48 | 18.23 | yes | 8.92E+06 | yes | 21.66 | yes | 22.23 | 6.00E+07 | yes |
| 49 | 21.53 | yes | 1.11E+06 | yes | 25.3  | yes | 25.86 | 2.49E+06 | yes |
| 50 | 19.61 | yes | 3.73E+06 | yes | 22.38 | yes | 23.17 | 3.20E+07 | yes |
| 51 | 32.22 | no  | 1.29E+03 | no  | 32.38 | no  | 34    | 5.12E+03 | no  |
| 52 | 25.48 | yes | 9.13E+04 | no  | 28.89 | yes | 29.85 | 1.08E+05 | no  |
| 53 | 39.17 | no  | 1.60E+01 | no  | neg   | no  | neg   |          | no  |
| 54 | 34.67 | no  | 2.74E+02 | no  | neg   | no  | 34.59 |          | no  |
| 55 | 31.31 | no  | 2.29E+03 | no  | 32.42 | no  | 35.05 | 4.95E+03 | no  |
| 56 | neg   | no  |          | no  | neg   | no  | neg   |          | no  |
| 57 | neg   | no  |          | no  | neg   | no  | neg   |          | no  |
| 58 | neg   | no  |          | no  | neg   | no  | neg   |          | no  |
| 59 | neg   | no  |          | no  | neg   | no  | neg   |          | no  |
| 60 | neg   | no  |          | no  | neg   | no  | neg   |          | no  |
| 61 | neg   | no  |          | no  | neg   | no  | neg   |          | no  |
| 62 | neg   | no  |          | no  | neg   | no  | neg   |          | no  |
| 63 | neg   | no  |          | no  | neg   | no  | neg   |          | no  |
| 64 | neg   | no  |          | no  | neg   | no  | neg   |          | no  |
| 65 | neg   | no  |          | no  | neg   | no  | neg   |          | no  |
| 66 | neg   | no  |          | no  | neg   | no  | neg   |          | no  |
| 67 | neg   | no  |          | no  | neg   | no  | neg   |          | no  |
| 68 | neg   | no  |          | no  | neg   | no  | neg   |          | no  |
| 69 | neg   | no  |          | no  | neg   | no  | neg   |          | no  |
| 70 | neg   | no  |          | no  | neg   | no  | neg   |          | no  |
| 71 | neg   | no  |          | no  | neg   | no  | neg   |          | no  |

|    |     |    |  |    |     |    |     |  |    |
|----|-----|----|--|----|-----|----|-----|--|----|
| 72 | neg | no |  | no | neg | no | neg |  | no |
| 73 | neg | no |  | no | neg | no | neg |  | no |
| 74 | neg | no |  | no | neg | no | neg |  | no |
| 75 | neg | no |  | no | neg | no | neg |  | no |
| 76 | neg | no |  | no | neg | no | neg |  | no |
| 77 | neg | no |  | no | neg | no | neg |  | no |
| 78 | neg | no |  | no | neg | no | neg |  | no |
| 79 | neg | no |  | no | neg | no | neg |  | no |
| 80 | neg | no |  | no | neg | no | neg |  | no |
| 81 | neg | no |  | no | neg | no | neg |  | no |
| 82 | neg | no |  | no | neg | no | neg |  | no |
| 83 | neg | no |  | no | neg | no | neg |  | no |
| 84 | neg | no |  | no | neg | no | neg |  | no |
| 85 | neg | no |  | no | neg | no | neg |  | no |

|            | GeneXpert  |                    |           |                        |                      | genesig®   |                    |                        |                      |
|------------|------------|--------------------|-----------|------------------------|----------------------|------------|--------------------|------------------------|----------------------|
| Sample No. | Ct N2-Gene | Isolation Ct-value | Ct E-Gene | Viral Load [copies/ml] | Isolation Viral Load | Ct ORF1a/b | Isolation Ct-value | Viral Load [copies/ml] | Isolation Viral Load |
| 1          | 38.1       | no                 | 35.1      | 5.85E+02               | no                   | neg        | no                 |                        | no                   |
| 2          | 25.5       | yes                | 23.4      | 2.82E+06               | yes                  | 30.75      | no                 | 6.16E+05               | no                   |
| 3          | 37.1       | no                 | 33.5      | 1.15E+03               | no                   | neg        | no                 |                        | no                   |
| 4          | 34.7       | no                 | 31.6      | 5.77E+03               | no                   | 36.15      | no                 | 1.39E+04               | no                   |
| 5          | 39.6       | no                 | 35.5      | 2.13E+02               | no                   | neg        | no                 |                        | no                   |
| 6          | 19.5       | yes                | 18        | 1.60E+08               | yes                  | 27.94      | yes                | 4.29E+06               | yes                  |
| 7          | 23.3       | yes                | 21.6      | 1.24E+07               | yes                  | 31.51      | no                 | 3.66E+05               | no                   |
| 8          | 23.8       | yes                | 21.6      | 8.85E+06               | yes                  | 30.94      | no                 | 5.40E+05               | no                   |

|    |      |     |      |          |     |       |     |          |     |
|----|------|-----|------|----------|-----|-------|-----|----------|-----|
| 9  | 24.2 | yes | 22.4 | 6.76E+06 | yes | 31.48 | no  | 3.73E+05 | no  |
| 10 | 27.7 | yes | 26.2 | 6.41E+05 | no  | 36.57 | no  | 2.16E+04 | no  |
| 11 | 24.4 | yes | 22.8 | 5.91E+06 | yes | 32.32 | no  | 2.09E+06 | yes |
| 12 | 26.6 | yes | 24.2 | 1.34E+06 | yes | 32.08 | no  | 2.46E+05 | no  |
| 13 | 33.8 | no  | 30.9 | 1.06E+04 | no  | 37.73 | no  | 3.87E+03 | no  |
| 14 | 19.4 | yes | 17.4 | 1.71E+08 | yes | 25.23 | yes | 2.78E+07 | yes |
| 15 | 29.3 | yes | 27.4 | 2.18E+05 | no  | 36.22 | no  | 2.80E+04 | no  |
| 16 | 21.4 | yes | 19.8 | 4.45E+07 | yes | neg   | no  |          | no  |
| 17 | 20   | yes | 18.2 | 1.14E+08 | yes | 26.88 | yes | 8.91E+06 | yes |
| 18 | 20.4 | yes | 18.3 | 8.72E+07 | yes | 25.99 | yes | 1.66E+07 | yes |
| 19 | 30.9 | no  | 28.4 | 7.44E+04 | no  | 35.21 | no  | 2.81E+04 | no  |
| 20 | 16.2 | yes | 13.4 | 1.47E+09 | yes | 20.79 | yes | 5.95E+08 | yes |
| 21 | 29.5 | yes | 27   | 1.91E+05 | no  | 34.91 | no  | 3.48E+04 | no  |
| 22 | 37.2 | no  | 35.3 | 1.07E+03 | no  | neg   | no  |          | no  |
| 23 | 22.6 | yes | 21.1 | 1.98E+07 | yes | 29.56 | yes | 1.31E+06 | yes |
| 24 | 35.6 | no  | 32.5 | 3.15E+03 | no  | 36.81 | no  | 8.32E+03 | no  |
| 25 | 27.8 | yes | 26   | 5.99E+05 | no  | 33.81 | no  | 7.51E+04 | no  |
| 26 | neg  | no  | neg  |          | no  | neg   | no  |          | no  |
| 27 | 33.6 | no  | 31.4 | 1.21E+04 | no  | neg   | no  |          | no  |
| 28 | 30.4 | no  | 28.3 | 1.04E+05 | no  | 36.15 | no  | 1.39E+04 | no  |
| 29 | 20.9 | yes | 19.5 | 6.23E+07 | yes | 28.3  | yes | 3.35E+06 | yes |
| 30 | 16.8 | yes | 16.4 | 9.84E+08 | yes | 25.81 | yes | 1.87E+07 | yes |
| 31 | 29.7 | yes | 27.3 | 1.67E+05 | no  | 35.73 | no  | 1.91E+04 | no  |
| 32 | 23.7 | yes | 21.4 | 9.46E+06 | yes | 30.97 | no  | 5.33E+06 | yes |
| 33 | 31.3 | no  | 29.1 | 5.68E+04 | no  | 35.88 | no  | 1.71E+04 | no  |
| 34 | 27.9 | yes | 25.9 | 5.60E+05 | no  | 33.34 | no  | 1.03E+05 | no  |

|    |      |     |      |          |     |       |     |          |     |
|----|------|-----|------|----------|-----|-------|-----|----------|-----|
| 35 | 24.7 | yes | 22.3 | 4.83E+06 | yes | 30.97 | no  | 5.30E+06 | yes |
| 36 | 36.8 | no  | 34.1 | 1.40E+03 | no  | neg   | no  |          | no  |
| 37 | 38.2 | no  | 34.5 | 5.47E+02 | no  | neg   | no  |          | no  |
| 38 | neg  | no  | neg  |          | no  | neg   | no  |          | no  |
| 39 | 34.1 | no  | 31.4 | 8.64E+03 | no  | neg   | no  |          | no  |
| 40 | neg  | no  | neg  |          | no  | neg   | no  |          | no  |
| 41 | 22.2 | yes | 20.5 | 2.60E+07 | yes | 29.63 | yes | 1.34E+06 | yes |
| 42 | 24   | yes | 22.6 | 7.73E+06 | yes | 30.7  | no  | 6.39E+05 | no  |
| 43 | 28.4 | yes | 23.6 | 4.00E+05 | no  | 32.97 | no  | 1.33E+05 | no  |
| 44 | neg  | no  | neg  |          | no  | neg   | no  |          | no  |
| 45 | 22.8 | yes | 20.3 | 1.73E+07 | yes | 28.84 | yes | 2.31E+06 | yes |
| 46 | 34.7 | no  | 31.5 | 5.77E+03 | no  | neg   | no  |          | no  |
| 47 | 41   | no  | 37.8 | 8.31E+01 | no  | neg   | no  |          | no  |
| 48 | 22.9 | yes | 20.5 | 1.62E+07 | yes | 29.55 | yes | 1.41E+06 | yes |
| 49 | 25.5 | yes | 23.6 | 2.82E+06 | yes | 32.04 | no  | 2.53E+06 | yes |
| 50 | 23.4 | yes | 21.1 | 1.16E+07 | yes | 29.04 | yes | 2.01E+06 | yes |
| 51 | 37.3 | no  | 33.8 | 1.00E+03 | no  | neg   | no  |          | no  |
| 52 | 30.5 | no  | 28.6 | 9.74E+04 | no  | 35.46 | no  | 2.35E+04 | no  |
| 53 | 41   | no  | neg  | 8.31E+01 | no  | neg   | no  |          | no  |
| 54 | 36   | no  | 33.8 | 2.40E+03 | no  | neg   | no  |          | no  |
| 55 | 34.7 | no  | 32.3 | 5.77E+03 | no  | neg   | no  |          | no  |
| 56 | neg  | no  | neg  |          | no  | neg   | no  |          | no  |
| 57 | neg  | no  | neg  |          | no  | neg   | no  |          | no  |
| 58 | neg  | no  | neg  |          | no  | neg   | no  |          | no  |
| 59 | neg  | no  | neg  |          | no  | neg   | no  |          | no  |
| 60 | neg  | no  | neg  |          | no  | neg   | no  |          | no  |

|    |     |    |     |  |    |     |    |  |    |
|----|-----|----|-----|--|----|-----|----|--|----|
| 61 | neg | no | neg |  | no | neg | no |  | no |
| 62 | neg | no | neg |  | no | neg | no |  | no |
| 63 | neg | no | neg |  | no | neg | no |  | no |
| 64 | neg | no | neg |  | no | neg | no |  | no |
| 65 | neg | no | neg |  | no | neg | no |  | no |
| 66 | neg | no | neg |  | no | neg | no |  | no |
| 67 | neg | no | neg |  | no | neg | no |  | no |
| 68 | neg | no | neg |  | no | neg | no |  | no |
| 69 | neg | no | neg |  | no | neg | no |  | no |
| 70 | neg | no | neg |  | no | neg | no |  | no |
| 71 | neg | no | neg |  | no | neg | no |  | no |
| 72 | neg | no | neg |  | no | neg | no |  | no |
| 73 | neg | no | neg |  | no | neg | no |  | no |
| 74 | neg | no | neg |  | no | neg | no |  | no |
| 75 | neg | no | neg |  | no | neg | no |  | no |
| 76 | neg | no | neg |  | no | neg | no |  | no |
| 77 | neg | no | neg |  | no | neg | no |  | no |
| 78 | neg | no | neg |  | no | neg | no |  | no |
| 79 | neg | no | neg |  | no | neg | no |  | no |
| 80 | neg | no | neg |  | no | neg | no |  | no |
| 81 | neg | no | neg |  | no | neg | no |  | no |
| 82 | neg | no | neg |  | no | neg | no |  | no |
| 83 | neg | no | neg |  | no | neg | no |  | no |
| 84 | neg | no | neg |  | no | neg | no |  | no |
| 85 | neg | no | neg |  | no | neg | no |  | no |



| Sample No. | RIDA®GENE |                    |                        |                      |
|------------|-----------|--------------------|------------------------|----------------------|
|            | Ct E-Gene | Isolation Ct-value | Viral Load [copies/ml] | Isolation Viral Load |
| 1          | 40        | no                 | 8.61E+02               | no                   |
| 2          | 28.68     | yes                | 2.20E+06               | yes                  |
| 3          | 40        | no                 | 8.61E+02               | no                   |
| 4          | 35.85     | no                 | 1.53E+03               | no                   |
| 5          | neg       | no                 |                        | no                   |
| 6          | 25        | yes                | 2.83E+07               | yes                  |
| 7          | 28.49     | yes                | 2.51E+06               | yes                  |
| 8          | 28.34     | yes                | 2.79E+06               | yes                  |
| 9          | 28.73     | yes                | 2.13E+06               | yes                  |
| 10         | 32.73     | no                 | 1.33E+05               | no                   |
| 11         | 28.94     | yes                | 1.83E+06               | yes                  |
| 12         | 29.56     | yes                | 1.20E+06               | yes                  |
| 13         | 37.01     | no                 | 6.84E+03               | no                   |
| 14         | 23.09     | yes                | 1.06E+08               | yes                  |
| 15         | 33.2      | no                 | 9.52E+04               | no                   |
| 16         | 30.99     | no                 | 4.43E+05               | no                   |
| 17         | 24.16     | yes                | 5.04E+07               | yes                  |
| 18         | 24.29     | yes                | 4.63E+07               | yes                  |
| 19         | 33.87     | no                 | 6.05E+04               | no                   |
| 20         | 18.91     | yes                | 1.92E+09               | yes                  |
| 21         | 33.14     | no                 | 9.97E+04               | no                   |
| 22         | 40        | no                 | 8.61E+02               | no                   |
| 23         | 27.08     | yes                | 6.69E+06               | yes                  |

|    |       |     |          |     |
|----|-------|-----|----------|-----|
| 24 | 40    | no  | 8.61E+02 | no  |
| 25 | 31.56 | no  | 2.98E+05 | no  |
| 26 | neg   | no  |          | no  |
| 27 | 38.01 | no  | 3.42E+03 | no  |
| 28 | 34.99 | no  | 2.77E+04 | no  |
| 29 | 25.46 | yes | 2.04E+07 | yes |
| 30 | 22.07 | yes | 2.16E+08 | yes |
| 31 | 33.92 | no  | 5.84E+04 | no  |
| 32 | 27.13 | yes | 6.45E+06 | yes |
| 33 | 34.1  | no  | 5.15E+04 | no  |
| 34 | 31.11 | no  | 4.09E+05 | no  |
| 35 | 28.62 | yes | 2.30E+06 | yes |
| 36 | 38.55 | no  | 2.36E+03 | no  |
| 37 | neg   | no  |          | no  |
| 38 | neg   | no  |          | no  |
| 39 | 39.46 | no  | 1.25E+03 | no  |
| 40 | neg   | no  |          | no  |
| 41 | 26.32 | yes | 1.13E+07 | yes |
| 42 | 28.27 | yes | 2.92E+06 | yes |
| 43 | 29.79 | yes | 1.02E+06 | yes |
| 44 | neg   | no  |          | no  |
| 45 | 25.9  | yes | 1.52E+07 | yes |
| 46 | 40    | no  | 8.61E+02 | no  |
| 47 | neg   | no  |          | no  |
| 48 | 26.55 | yes | 9.56E+06 | yes |
| 49 | 29.54 | yes | 1.21E+06 | yes |

|    |       |     |          |     |
|----|-------|-----|----------|-----|
| 50 | 27.04 | yes | 6.85E+06 | yes |
| 51 | neg   | no  |          | no  |
| 52 | 34.16 | no  | 4.94E+04 | no  |
| 53 | neg   | no  |          | no  |
| 54 | 40    | no  | 8.61E+02 | no  |
| 55 | 36.83 | no  | 7.72E+03 | no  |
| 56 | neg   | no  |          | no  |
| 57 | neg   | no  |          | no  |
| 58 | neg   | no  |          | no  |
| 59 | neg   | no  |          | no  |
| 60 | neg   | no  |          | no  |
| 61 | neg   | no  |          | no  |
| 62 | neg   | no  |          | no  |
| 63 | neg   | no  |          | no  |
| 64 | neg   | no  |          | no  |
| 65 | neg   | no  |          | no  |
| 66 | neg   | no  |          | no  |
| 67 | neg   | no  |          | no  |
| 68 | neg   | no  |          | no  |
| 69 | neg   | no  |          | no  |
| 70 | neg   | no  |          | no  |
| 71 | neg   | no  |          | no  |
| 72 | neg   | no  |          | no  |
| 73 | neg   | no  |          | no  |
| 74 | neg   | no  |          | no  |
| 75 | neg   | no  |          | no  |

|    |     |    |  |    |
|----|-----|----|--|----|
| 76 | neg | no |  | no |
| 77 | neg | no |  | no |
| 78 | neg | no |  | no |
| 79 | neg | no |  | no |
| 80 | neg | no |  | no |
| 81 | neg | no |  | no |
| 82 | neg | no |  | no |
| 83 | neg | no |  | no |
| 84 | neg | no |  | no |
| 85 | neg | no |  | no |

Supplementary Table S3: Results of standard curve measurements. Defined viral loads were analyzed on the respective systems. Ct values and the corresponding viral loads are shown. Viral loads below 10<sup>3</sup> were not detectable for genesig® and RIDA®GENE.

|           | Ct values |             |           |          |           |
|-----------|-----------|-------------|-----------|----------|-----------|
| copies/ml | Alinity m | cobas® 6800 | GeneXpert | genesig® | RIDA®GENE |
| 1.00E+07  | 17.95     | 23.77       | 23.62     | 27.70    | 26.43     |
| 1.00E+06  | 21.61     | 26.41       | 27.04     | 31.04    | 29.75     |
| 1.00E+05  | 25.99     | 29.86       | 30.46     | 34.38    | 33.07     |
| 1.00E+04  | 29.10     | 32.36       | 33.88     | 37.71    | 36.40     |
| 1.00E+03  | 32.30     | 34.20       | 37.30     | n.a.     | n.a.      |
| 1.00E+02  | 36.37     | 36.88       | 40.72     | n.a.     | n.a.      |

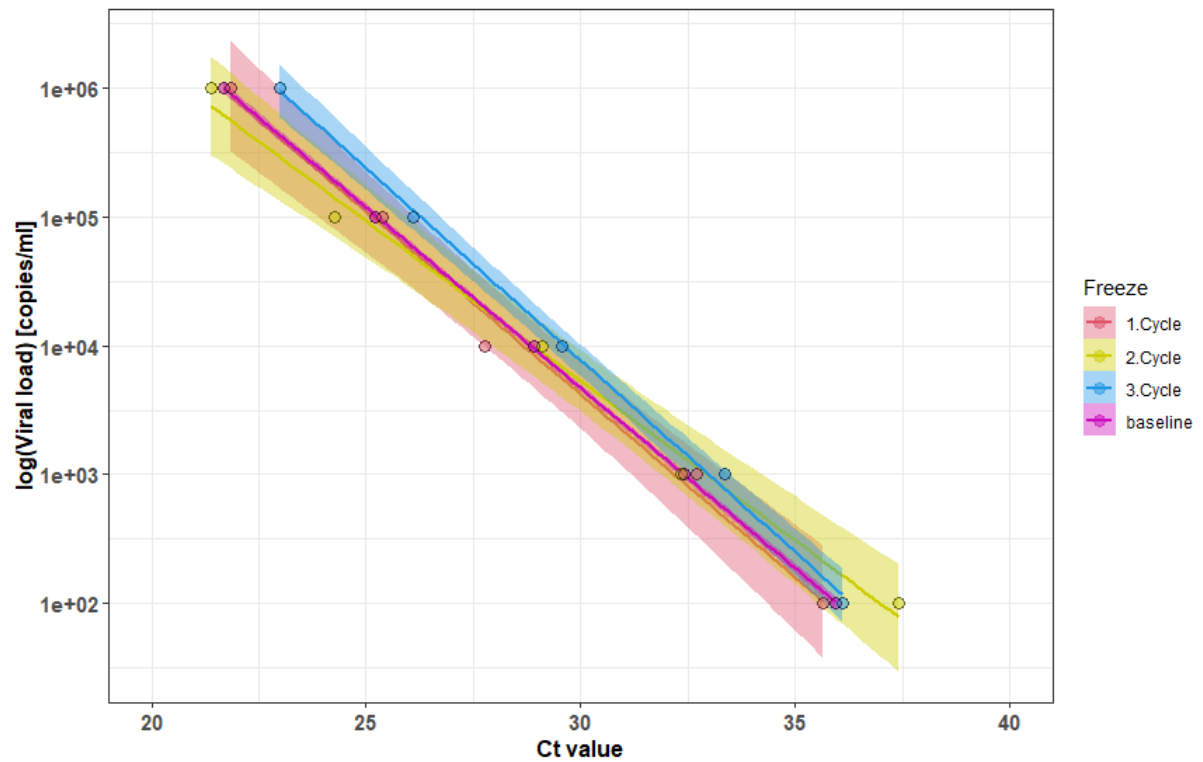

Supplementary Figure S1: Impact of freeze/thaw cycles on standard curve generation. Standard curves were generated via serial dilution measurements of a sample with a known SARS-CoV-2 concentration using our reference method on the Alinity m. This was done at baseline and following three freeze/thaw cycles (12 hours freezing at -80°C for each cycle). Standard curves are shown with the respective 95% confidence intervals.

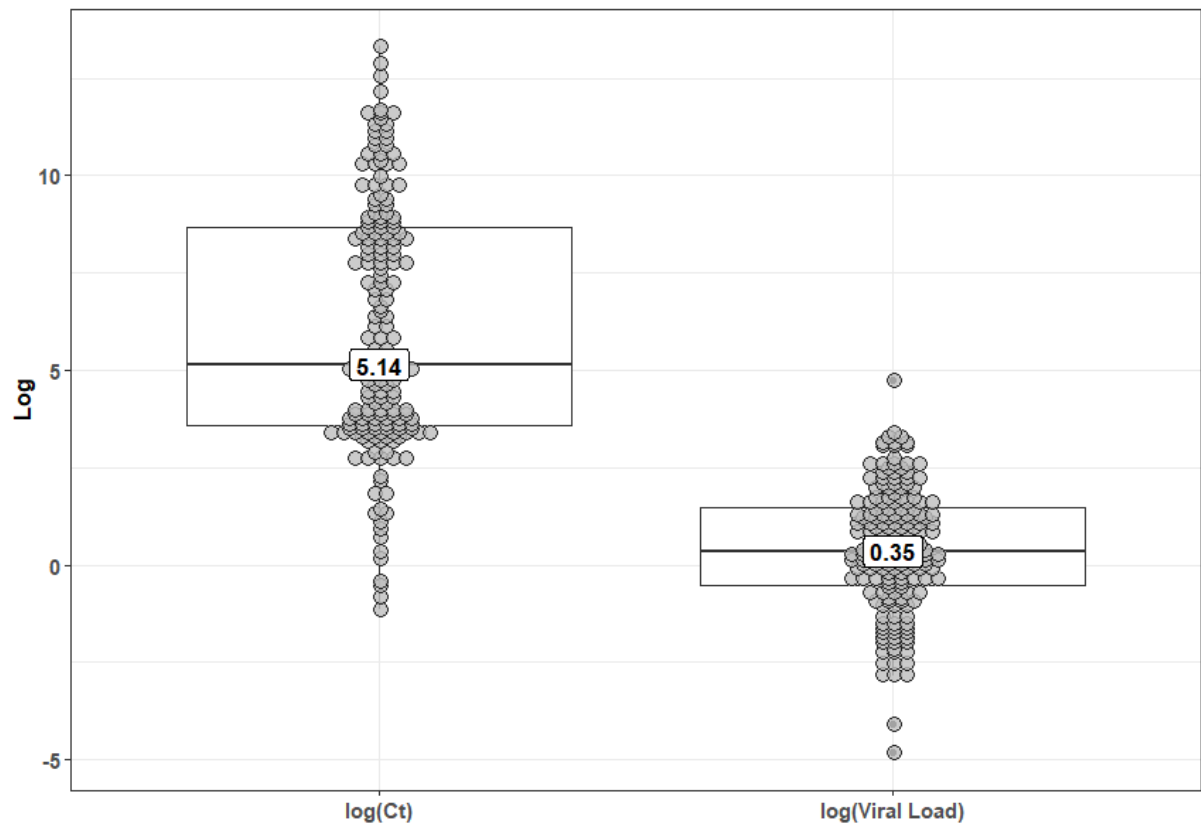

Supplementary Figure S2: Boxplot of  $\log(\text{Ct})$  and  $\log(\text{Viral Load})$ . Medians are displayed in the respective boxplots.
